# Supplementary material
Source: HighWire-hosted journal article supplement (https://bmjopen.bmj.com/content/8/3/e019490)
Supplement: inline-supplementary-material-1 [file inline-supplementary-material-1.pdf]

## **Supplement 1. Medline search**

("premenstrual syndrome"[MeSH Terms] OR "premenstrual syndrome"[All Fields]) AND ("ethanol"[MeSH Terms] OR "ethanol"[All Fields] OR "alcohol"[All Fields])

1: Acikgoz A, Dayi A, Binbay T. Prevalence of premenstrual syndrome and its relationship to depressive symptoms in first-year university students. Saudi Med J. 2017 Nov;38(11):1125-1131. doi: 10.15537/smj.2017.11.20526. PubMed PMID: 29114701.

2: Blainski A, Gionco B, Oliveira AG, Andrade G, Scarminio IS, Silva DB, Lopes NP, Mello JC. Antibacterial activity of Limonium brasiliense (Baicuru) against multidrug-resistant bacteria using a statistical mixture design. J Ethnopharmacol. 2017 Feb 23;198:313-323. doi: 10.1016/j.jep.2017.01.013. Epub 2017 Jan 13. PubMed PMID: 28089736.

3: İşik H, Ergöl Ş, Aynioğlu Ö, Şahbaz A, Kuzu A, Uzun M. Premenstrual syndrome and life quality in Turkish health science students. Turk J Med Sci. 2016 Apr 19;46(3):695-701. doi: 10.3906/sag-1504-140. PubMed PMID: 27513243.

4: Kepple AL, Lee EE, Haq N, Rubinow DR, Schmidt PJ. History of postpartum depression in a clinic-based sample of women with premenstrual dysphoric disorder. J Clin Psychiatry. 2016 Apr;77(4):e415-20. doi: 10.4088/JCP.15m09779. PubMed PMID: 27035701.

5: Timby E, Bäckström T, Nyberg S, Stenlund H, Wihlbäck AC, Bixo M. Women with premenstrual dysphoric disorder have altered sensitivity to allopregnanolone over the menstrual cycle compared to controls—a pilot study. *Psychopharmacology (Berl)*. 2016 Jun;233(11):2109-17. doi: 10.1007/s00213-016-4258-1. Epub 2016 Mar 10. PubMed PMID: 26960697.

6: Kim K, Hong JP, Cho MJ, Fava M, Mischoulon D, Lee DW, Heo JY, Jeon HJ. Loss of sexual interest and premenstrual mood change in women with postpartum versus non-postpartum depression: A nationwide community sample of Korean adults. *J Affect Disord*. 2016 Feb;191:222-9. doi: 10.1016/j.jad.2015.11.050. Epub 2015 Dec 2. PubMed PMID: 26682491.

7: Doyle C, Swain WA, Ewald HA, Cook CL, Ewald PW. Sexually Transmitted Pathogens, Depression, and Other Manifestations Associated with Premenstrual Syndrome. *Hum Nat*. 2015 Sep;26(3):277-91. doi: 10.1007/s12110-015-9238-3. PubMed PMID: 26272230.

8: Ju H, Jones M, Mishra GD. Illicit drug use, early age at first use and risk of premenstrual syndrome: A longitudinal study. *Drug Alcohol Depend*. 2015 Jul 1;152:209-17. doi: 10.1016/j.drugalcdep.2015.03.037. Epub 2015 Apr 17. PubMed PMID: 25920763.

9: Goker A, Artunc-Ulkumen B, Aktenk F, Ikiz N. Premenstrual syndrome in Turkish

medical students and their quality of life. *J Obstet Gynaecol*. 2015 Apr;35(3):275-8.

doi: 10.3109/01443615.2014.948820. Epub 2014 Aug 20. PubMed PMID:

25140580.

10: Bäckström T, Bixo M, Johansson M, Nyberg S, Ossewaarde L, Ragagnin G, Savic I, Strömberg J, Timby E, van Broekhoven F, van Wingen G. Allopregnanolone and mood disorders. *Prog Neurobiol*. 2014 Feb;113:88-94. doi:

10.1016/j.pneurobio.2013.07.005. Epub 2013 Aug 23. Review. PubMed PMID: 23978486.

11: Cheng SH, Shih CC, Yang YK, Chen KT, Chang YH, Yang YC. Factors associated with premenstrual syndrome - a survey of new female university students.

*Kaohsiung J Med Sci*. 2013 Feb;29(2):100-5. doi: 10.1016/j.kjms.2012.08.017.

Epub 2013 Jan 3. PubMed PMID: 23347812.

12: Kiesner J. Affective response to the menstrual cycle as a predictor of self-reported affective response to alcohol and alcohol use. *Arch Womens Ment Health*.

2012 Dec;15(6):423-32. doi: 10.1007/s00737-012-0303-1. Epub 2012 Aug 23.

PubMed PMID: 22915027.

13: Li X, Gan Y, Zhang H, Qiao M, Hou Z, Guan Z, Liang M. [Study on preparation method of Yueanjian for treatment of premenstrual syndrome]. *Zhongguo Zhong Yao Za Zhi*. 2012 Apr;37(7):925-8. Chinese. PubMed PMID: 22792790.

14: Hong JP, Park S, Wang HR, Chang SM, Sohn JH, Jeon HJ, Lee HW, Cho SJ, Kim BS, Bae JN, Cho MJ. Prevalence, correlates, comorbidities, and suicidal tendencies of premenstrual dysphoric disorder in a nationwide sample of Korean women. *Soc Psychiatry Psychiatr Epidemiol*. 2012 Dec;47(12):1937-45. doi: 10.1007/s00127-012-0509-6. Epub 2012 Apr 27. PubMed PMID: 22538387.

15: Wöber C. [Trigger factors in headache and migraine: myths and facts]. *MMW Fortschr Med*. 2012 Feb 9;154(2):65-7. German. PubMed PMID: 22352256.

16: Forrester-Knauss C, Zemp Stutz E, Weiss C, Tschudin S. The interrelation between premenstrual syndrome and major depression: results from a population-based sample. *BMC Public Health*. 2011 Oct 12;11:795. doi: 10.1186/1471-2458-11-795. PubMed PMID: 21992230; PubMed Central PMCID: PMC3209462.

17: Bäckström T, Haage D, Löfgren M, Johansson IM, Strömberg J, Nyberg S, Andréen L, Ossewaarde L, van Wingen GA, Turkmen S, Bengtsson SK. Paradoxical effects of GABA-A modulators may explain sexsteroid induced negative mood symptoms in some persons. *Neuroscience*. 2011 Sep 15;191:46-54. doi: 10.1016/j.neuroscience.2011.03.061. Epub 2011 May 13. Review. PubMed PMID: 21600269.

18: Pinar G, Colak M, Oksuz E. Premenstrual Syndrome in Turkish college students and its effects on life quality. *Sex Reprod Healthc.* 2011 Jan;2(1):21-7. doi: 10.1016/j.srhc.2010.10.001. Epub 2010 Oct 15. PubMed PMID: 21147455.

19: Nillni YI, Rohan KJ, Bernstein A, Zvolensky MJ. Premenstrual distress predicts panic-relevant responding to a CO2 challenge among young adult females. *J Anxiety Disord.* 2010 May;24(4):416-22. doi: 10.1016/j.janxdis.2010.02.006. Epub 2010 Feb 20. PubMed PMID: 20226625; PubMed Central PMCID: PMC2865427.

20: Sadler C, Smith H, Hammond J, Bayly R, Borland S, Panay N, Crook D, Inskip H; Southampton Women's Survey Study Group. Lifestyle factors, hormonal contraception, and premenstrual symptoms: the United Kingdom Southampton Women's Survey. *J Womens Health (Larchmt).* 2010 Mar;19(3):391-6. doi: 10.1089/jwh.2008.1210. PubMed PMID: 20156129; PubMed Central PMCID: PMC3091016.

21: Bertone-Johnson ER, Hankinson SE, Johnson SR, Manson JE. Timing of alcohol use and the incidence of premenstrual syndrome and probable premenstrual dysphoric disorder. *J Womens Health (Larchmt).* 2009 Dec;18(12):1945-53. doi: 10.1089/jwh.2009.1468. PubMed PMID: 20044856; PubMed Central PMCID: PMC2828255.

22: Martini J, Wittchen HU, Soares CN, Rieder A, Steiner M. New women-specific diagnostic modules: the Composite International Diagnostic Interview for Women (CIDI-VENUS). *Arch Womens Ment Health.* 2009 Oct;12(5):281-9. doi:

10.1007/s00737-009-0077-2. Epub 2009 Jun 16. PubMed PMID: 19533302.

23: Nakade M, Takeuchi H, Kurotani M, Harada T. Effects of meal habits and alcohol/cigarette consumption on morningness-eveningness preference and sleep habits by Japanese female students aged 18-29. *J Physiol Anthropol*. 2009 Mar;28(2):83-90. PubMed PMID: 19346668.

24: Andréen L, Nyberg S, Turkmen S, van Wingen G, Fernández G, Bäckström T. Sex steroid induced negative mood may be explained by the paradoxical effect mediated by GABAA modulators. *Psychoneuroendocrinology*. 2009 Sep;34(8):1121-32. doi: 10.1016/j.psyneuen.2009.02.003. Epub 2009 Mar 9. Review. PubMed PMID: 19272715.

25: Fukui PT, Gonçalves TR, Strabelli CG, Lucchino NM, Matos FC, Santos JP, Zukerman E, Zukerman-Guendler V, Mercante JP, Masruha MR, Vieira DS, Peres MF. Trigger factors in migraine patients. *Arq Neuropsiquiatr*. 2008 Sep;66(3A):494-9. PubMed PMID: 18813707.

26: Brozic P, Turk S, Lanisnik Rizner T, Gobec S. Discovery of new inhibitors of aldo-keto reductase 1C1 by structure-based virtual screening. *Mol Cell Endocrinol*. 2009 Mar 25;301(1-2):245-50. doi: 10.1016/j.mce.2008.08.002. Epub 2008 Aug 14. PubMed PMID: 18765269.

27: Reed SC, Levin FR, Evans SM. Changes in mood, cognitive performance and appetite in the late luteal and follicular phases of the menstrual cycle in women with and without PMDD (premenstrual dysphoric disorder). *Horm Behav.* 2008 Jun;54(1):185-93. doi: 10.1016/j.yhbeh.2008.02.018. Epub 2008 Mar 7. PubMed PMID: 18413151; PubMed Central PMCID: PMC2491904.

28: Hu Y, Hou TT, Zhang QY, Xin HL, Zheng HC, Rahman K, Qin LP. Evaluation of the estrogenic activity of the constituents in the fruits of *Vitex rotundifolia* L. for the potential treatment of premenstrual syndrome. *J Pharm Pharmacol.* 2007 Sep;59(9):1307-12. PubMed PMID: 17883902.

29: Gold EB, Bair Y, Block G, Greendale GA, Harlow SD, Johnson S, Kravitz HM, Rasor MO, Siddiqui A, Sternfeld B, Utts J, Zhang G. Diet and lifestyle factors associated with premenstrual symptoms in a racially diverse community sample: Study of Women's Health Across the Nation (SWAN). *J Womens Health (Larchmt).* 2007 Jun;16(5):641-56. Erratum in: *J Womens Health (Larchmt).* 2007 Jul-Aug;16(6):934. PubMed PMID: 17627400.

30: Allsworth JE, Clarke J, Peipert JF, Hebert MR, Cooper A, Boardman LA. The influence of stress on the menstrual cycle among newly incarcerated women. *Womens Health Issues.* 2007 Jul-Aug;17(4):202-9. Epub 2007 Jun 7. PubMed PMID: 17560123; PubMed Central PMCID: PMC2170522.

31: Shaver JL, Wilbur J, Robinson FP, Wang E, Buntin MS. Women's health issues with fibromyalgia syndrome. *J Womens Health (Larchmt)*. 2006 Nov;15(9):1035-45. PubMed PMID: 17125422.

32: Bryant M, Truesdale KP, Dye L. Modest changes in dietary intake across the menstrual cycle: implications for food intake research. *Br J Nutr*. 2006 Nov;96(5):888-94. PubMed PMID: 17092378.

33: Svikis DS, Miles DR, Haug NA, Perry B, Hoehn-Saric R, McLeod D. Premenstrual symptomatology, alcohol consumption, and family history of alcoholism in women with premenstrual syndrome. *J Stud Alcohol*. 2006 Nov;67(6):833-6. PubMed PMID: 17060999.

34: Latthe P, Mignini L, Gray R, Hills R, Khan K. Factors predisposing women to chronic pelvic pain: systematic review. *BMJ*. 2006 Apr 1;332(7544):749-55. Epub 2006 Feb 16. Review. PubMed PMID: 16484239; PubMed Central PMCID: PMC1420707.

35: N-Wihlbäck AC, Sundström-Poromaa I, Bäckström T. Action by and sensitivity to neuroactive steroids in menstrual cycle related CNS disorders. *Psychopharmacology (Berl)*. 2006 Jun;186(3):388-401. Epub 2005 Dec 15. Review. PubMed PMID: 16362406.

36: Sein Anand J, Chodorowski Z, Ciechanowicz R, Wiśniewski M, Pankiewicz P. The



relationship between suicidal attempts and menstrual cycle in women. *Przegl Lek.* 2005;62(6):431-3. PubMed PMID: 16225087.

37: Nyberg S, Andersson A, Zingmark E, Wahlström G, Bäckström T, Sundström-Poromaa I. The effect of a low dose of alcohol on allopregnanolone serum concentrations across the menstrual cycle in women with severe premenstrual syndrome and controls. *Psychoneuroendocrinology.* 2005 Oct;30(9):892-901. PubMed PMID: 15979810.

38: Perry BL, Miles D, Burruss K, Svikis DS. Premenstrual symptomatology and alcohol consumption in college women. *J Stud Alcohol.* 2004 Jul;65(4):464-8. PubMed PMID: 15376821.

39: Smith SS, Ruderman Y, Hua Gong Q, Gulinello M. Effects of a low dose of ethanol in an animal model of premenstrual anxiety. *Alcohol.* 2004 May;33(1):41-9. PubMed PMID: 15353172; PubMed Central PMCID: PMC4168969.

40: Casanueva E. [Non-pregnant women's nutrition and its impact in life quality]. *Ginecol Obstet Mex.* 1999 Mar;67:104-12. Review. Spanish. PubMed PMID: 15338580.

41: Nyberg S, Wahlström G, Bäckström T, Sundström Poromaa I. Altered sensitivity to alcohol in the late luteal phase among patients with premenstrual dysphoric

disorder. Psychoneuroendocrinology. 2004 Jul;29(6):767-77. PubMed PMID: 15110926.

42: Bäckström T, Andersson A, Andréé L, Birzniece V, Bixo M, Björn I, Haage D, Isaksson M, Johansson IM, Lindblad C, Lundgren P, Nyberg S, Odmark IS, Strömberg J, Sundström-Poromaa I, Turkmen S, Wahlström G, Wang M, Wihlbäck AC, Zhu D, Zingmark E. Pathogenesis in menstrual cycle-linked CNS disorders. Ann N Y Acad Sci. 2003 Dec;1007:42-53. Review. PubMed PMID: 14993039.

43: Kouri EM, Halbreich U. Effects of alcohol and other drugs in women of reproductive age: hormonal interactions. Drugs Today (Barc). 1998 Oct;34(10):837-43. PubMed PMID: 14743255.

44: Peters TJ, Deacon AC. International air travel: a risk factor for attacks in acute intermittent porphyria. Clin Chim Acta. 2003 Sep;335(1-2):59-63. PubMed PMID: 12927685.

45: Bäckström T, Andreen L, Birzniece V, Björn I, Johansson IM, Nordenstam-Haghjo M, Nyberg S, Sundström-Poromaa I, Wahlström G, Wang M, Zhu D. The role of hormones and hormonal treatments in premenstrual syndrome. CNS Drugs. 2003;17(5):325-42. Review. PubMed PMID: 12665391.

46: Rothman RB, Baumann MH. Therapeutic and adverse actions of serotonin

transporter substrates. *Pharmacol Ther.* 2002 Jul;95(1):73-88. Review. PubMed PMID: 12163129.

47: Sundstrom-Poromaa I, Smith DH, Gong QH, Sabado TN, Li X, Light A, Wiedmann M, Williams K, Smith SS. Hormonally regulated alpha(4)beta(2)delta GABA(A) receptors are a target for alcohol. *Nat Neurosci.* 2002 Aug;5(8):721-2. PubMed PMID: 12118257; PubMed Central PMCID: PMC2887346.

48: Ottley C. Food and mood. *Nurs Stand.* 2000 Sep 27-Oct 3;15(2):46-52; quiz 54-5. Review. PubMed PMID: 11971416.

49: Rothman RB, Baumann MH. Serotonin releasing agents. Neurochemical, therapeutic and adverse effects. *Pharmacol Biochem Behav.* 2002 Apr;71(4):825-36. Review. PubMed PMID: 11888573.

50: Limosin F, Ades J. [Psychiatric and psychological aspects of premenstrual syndrome]. *Encephale.* 2001 Nov-Dec;27(6):501-8. Review. French. PubMed PMID: 11865558.

51: Johnson S. The multifaceted and widespread pathology of magnesium deficiency. *Med Hypotheses.* 2001 Feb;56(2):163-70. PubMed PMID: 11425281.

52: Pollock BG. Citalopram: a comprehensive review. *Expert Opin Pharmacother*. 2001 Apr;2(4):681-98. Review. PubMed PMID: 11336616.

53: Li C, Samsioe G, Lidfelt J, Nerbrand C, Agardh CD; Women's Health in Lund Area (WHILA) Study. Important factors for use of hormone replacement therapy: a population-based study of Swedish women. *The Women's Health in Lund Area (WHILA) Study. Menopause*. 2000 Jul-Aug;7(4):273-81. PubMed PMID: 10914621.

54: Kritz-Silverstein D, Wingard DL, Garland FC. The association of behavior and lifestyle factors with menstrual symptoms. *J Womens Health Gen Based Med*. 1999 Nov;8(9):1185-93. PubMed PMID: 10595332.

55: Deuster PA, Adera T, South-Paul J. Biological, social, and behavioral factors associated with premenstrual syndrome. *Arch Fam Med*. 1999 Mar-Apr;8(2):122-8. PubMed PMID: 10101982.

56: Smith SS, Gong QH, Li X, Moran MH, Bitran D, Frye CA, Hsu FC. Withdrawal from 3alpha-OH-5alpha-pregnan-20-One using a pseudopregnancy model alters the kinetics of hippocampal GABAA-gated current and increases the GABAA receptor alpha4 subunit in association with increased anxiety. *J Neurosci*. 1998 Jul 15;18(14):5275-84. PubMed PMID: 9651210.

57: Smith SS, Gong QH, Hsu FC, Markowitz RS, French-Mullen JM, Li X. GABA(A) receptor alpha4 subunit suppression prevents withdrawal properties of an endogenous steroid. *Nature*. 1998 Apr 30;392(6679):926-30. PubMed PMID: 9582073.

58: Allen D. Are alcoholic women more likely to drink premenstrually? *Alcohol Alcohol*. 1996 Mar;31(2):145-7. PubMed PMID: 8737009.

59: Ragan PW. Greater alcohol use in women with PMS. *Am J Psychiatry*. 1995 Oct;152(10):1539-40. PubMed PMID: 7573607.

60: Chuong CJ, Burgos DM. Medical history in women with premenstrual syndrome. *J Psychosom Obstet Gynaecol*. 1995 Mar;16(1):21-7. PubMed PMID: 7787954.

61: Tobin MB, Schmidt PJ, Rubinow DR. Reported alcohol use in women with premenstrual syndrome. *Am J Psychiatry*. 1994 Oct;151(10):1503-4. PubMed PMID: 8092343.

62: McLeod DR, Foster GV, Hoehn-Saric R, Svikis DS, Hipsley PA. Family history of alcoholism in women with generalized anxiety disorder who have premenstrual syndrome: patient reports of premenstrual alcohol consumption and symptoms of anxiety. *Alcohol Clin Exp Res*. 1994 Jun;18(3):664-70. PubMed PMID: 7943673.

63: Marks JL, Hair CS, Klock SC, Ginsburg BE, Pomerleau CS. Effects of menstrual phase on intake of nicotine, caffeine, and alcohol and nonprescribed drugs in women with late luteal phase dysphoric disorder. *J Subst Abuse*. 1994;6(2):235-43. PubMed PMID: 7804022.

64: Caan B, Duncan D, Hiatt R, Lewis J, Chapman J, Armstrong MA. Association between alcoholic and caffeinated beverages and premenstrual syndrome. *J Reprod Med*. 1993 Aug;38(8):630-6. PubMed PMID: 8410870.

65: Fark AR. A pilot study of white-coat and labile hypertension: associations with diagnoses of psychosocial dysfunction. *Fam Pract Res J*. 1993 Mar;13(1):71-80. PubMed PMID: 8484344.

66: Shibasaki M, Takeda K, Sumazaki R, Nogami T, Takita H. Premenstrual asthma with seasonal variation. *Ann Allergy*. 1992 Apr;68(4):315-8. PubMed PMID: 1348404.

67: Tarczyoska-Nosal S, Ekiert M, Kostrzevska E. [Factors inducing clinical symptoms of acute hepatic porphyria 1986-1990]. *Acta Haematol Pol*. 1991;22(1):100-4. Polish. PubMed PMID: 1823950.

68: Charette L, Tate DL, Wilson A. Alcohol consumption and menstrual distress in women at higher and lower risk for alcoholism. *Alcohol Clin Exp Res*. 1990 Apr;14(2):152-7. PubMed PMID: 2190478.

69: Mello NK, Mendelson JH, Lex BW. Alcohol use and premenstrual symptoms in social drinkers. *Psychopharmacology (Berl)*. 1990;101(4):448-55. PubMed PMID: 2388970.

70: Christensen AP, Oei TP, Callan VJ. The relationship between premenstrual dysphoria and daily ratings dimensions. *J Affect Disord*. 1989 Mar-Jun;16(2-3):127-32. PubMed PMID: 2522111.

71: Gannon L, Luchetta T, Pardie L, Rhodes K. Perimenstrual symptoms: relationships with chronic stress and selected lifestyle variables. *Behav Med*. 1989 Winter;15(4):149-59. PubMed PMID: 2597778.

72: Garber MR, Kovalenko AE. [Effect of female sexsteroids on levels of endogenous ethanol]. *Probl Endokrinol (Mosk)*. 1988 Jan-Feb;34(1):31-4. Russian. PubMed PMID: 3362808.

73: Massil HY, O'Brien PM. Approach to the management of premenstrual syndrome. *Clin Obstet Gynecol*. 1987 Jun;30(2):443-52. PubMed PMID: 3608284.

74: Mello NK, Mendelson JH, Palmieri SL. Cigarette smoking by women: interactions with alcohol use. *Psychopharmacology (Berl)*. 1987;93(1):8-15. PubMed PMID: 3114817.

75: Griffin ML, Mendelson JH, Mello NK, Lex BW. Marijuana use across the menstrual cycle. *Drug Alcohol Depend*. 1986 Oct;18(2):213-24. PubMed PMID: 3780416.

76: Stout AL, Steege JF, Blazer DG, George LK. Comparison of lifetime psychiatric diagnoses in Premenstrual Syndrome Clinic and community samples. *J Nerv Ment Dis*. 1986 Sep;174(9):517-22. PubMed PMID: 3746277.

77: Halliday A, Bush B, Cleary P, Aronson M, Delbanco T. Alcohol abuse in women seeking gynecologic care. *Obstet Gynecol*. 1986 Sep;68(3):322-6. PubMed PMID: 3737053.

78: Mello NK. Drug use patterns and premenstrual dysphoria. *NIDA Res Monogr*. 1986;65:31-48. Review. PubMed PMID: 3090443.

79: Sutker PB, Allain AN, Brantley PJ, Randall CL. Acute alcohol intoxication,



negative affect, and autonomic arousal in women and men. *Addict Behav.* 1982;7(1):17-25. PubMed PMID: 7200716.

80: Wood C, Larsen L, Williams R. Social and psychological factors in relation to premenstrual tension and menstrual pain. *Aust N Z J Obstet Gynaecol.* 1979 May;19(2):111-5. PubMed PMID: 292427.

81: Weissman MM, Klerman GL. Sex differences and the epidemiology of depression. *Arch Gen Psychiatry.* 1977 Jan;34(1):98-111. Review. PubMed PMID: 319772.

82: Beckman LJ. Women alcoholics. A review of social and psychological studies. *J Stud Alcohol.* 1975 Jul;36(7):797-824. Review. PubMed PMID: 240065.

83: Belfer ML, Shader RI, Carroll M, Harmatz JS. Alcoholism in women. *Arch Gen Psychiatry.* 1971 Dec;25(6):540-4. PubMed PMID: 5168854.

84: Cermak I, Ringel R. [Clinical experiences with the new psychoactivator Deanxit (Melitracen and Flupenthixol)]. *Schweiz Rundsch Med Prax.* 1971 Jun 8;60(23):757-62. German. PubMed PMID: 5104765.

85: Gerlach E. [What is the place for a depot sympathomimetic in gynecologic

practice?]. Hippokrates. 1969 Sep;40(18):727-31. German. PubMed PMID: 4390995.

86: AKERMAN R. [The efficacy of Vasculat in premenstrual, menstrual, pelviopathic and climacteric disorders]. Wien Med Wochenschr. 1962 Mar 31;112:254-5.

German. PubMed PMID: 13859908.

87: AKERMAN R. [The effect of Vasculat in premenstrual, menstrual, pelviopathic and climacteric disorders]. Wien Med Wochenschr. 1962 Mar 31;112:254-5.

German. PubMed PMID: 13859907.
