# Supplementary material
Source: HighWire-hosted journal article supplement (https://bmjopen.bmj.com/content/8/3/e019490)
Supplement: inline-supplementary-material-2 [file inline-supplementary-material-2.pdf]

## Supplement 2: quality assessment

| Source                               | Exposure assessment | PMS diagnosis | Confounding | Participation | Target population | Total |
|--------------------------------------|---------------------|---------------|-------------|---------------|-------------------|-------|
| Wilsnack 1984 <sup>16</sup>          | 1                   | 0             | 0           | 1             | 1                 | 3     |
| Stout 1986 <sup>28</sup>             | 0                   | 0             | 0           | 0             | 0                 | 0     |
| Rossignol 1991 <sup>29</sup>         | 0                   | 1             | 0           | 0             | 0                 | 1     |
| Caan 1993 <sup>30</sup>              | 1                   | 1             | 0           | 0             | 0                 | 2     |
| Chuong 1995 <sup>31</sup>            | 0                   | 0             | 0           | 0             | 0                 | 0     |
| Deuster 1999 <sup>9</sup>            | 1                   | 1             | 1           | 0             | 1                 | 4     |
| Hourani 2004 <sup>32</sup>           | 1                   | 0             | 1           | 0             | 1                 | 3     |
| Strine 2005 <sup>10</sup>            | 0                   | 0             | 0           | 0             | 1                 | 1     |
| Bryant 2006 <sup>22</sup>            | 1                   | 1             | 0           | 0             | 0                 | 2     |
| Gold 2007 <sup>13</sup>              | 1                   | 0             | 0           | 0             | 1                 | 2     |
| Reed 2008 <sup>23</sup>              | 1                   | 1             | 0           | 0             | 0                 | 2     |
| Bertone-Johnson 2009 <sup>12</sup>   | 1                   | 1             | 1           | 1             | 1                 | 5     |
| Sadler 2010 <sup>14</sup>            | 1                   | 1             | 1           | 0             | 0                 | 3     |
| Skrzypulec-Plinta 2010 <sup>11</sup> | 1                   | 1             | 1           | 0             | 1                 | 4     |
| Forrester-Knauss 2011 <sup>33</sup>  | 0                   | 1             | 0           | 0             | 1                 | 2     |
| Pinar 2011 <sup>34</sup>             | 0                   | 1             | 0           | 1             | 1                 | 3     |
| Hong 2012 <sup>35</sup>              | 0                   | 1             | 0           | 1             | 1                 | 3     |
| Cheng 2013 <sup>36</sup>             | 0                   | 1             | 1           | 1             | 1                 | 4     |
| Ju 2015 <sup>37</sup>                | 1                   | 0             | 1           | 0             | 1                 | 3     |
